# Supplementary material for: Improved production of a recombinant Rhizomucor miehei lipase expressed in Pichia pastoris and its application for conversion of microalgae oil to biodiesel
Source: PubMed Central journal article supplement (PMC4364654; doi:10.1186/1754-6834-7-111), 2014-08-04
Supplement: 13068_2014_511_MOESM3_ESM.pdf [file 13068_2014_511_MOESM3_ESM.pdf]

### Additional File 3: Table S1

Table S1. Target gene copy number in four recombinant strains.

| Strain                | Ct( <i>rml</i> ) | Ct( <i>gap</i> ) | Copy number     |
|-----------------------|------------------|------------------|-----------------|
| m $\alpha$ -1pRML-X33 | 20.33 $\pm$ 0.11 | 20.64 $\pm$ 0.08 | 1.06 $\pm$ 0.04 |
| m $\alpha$ -2pRML-X33 | 25.03 $\pm$ 0.08 | 26.49 $\pm$ 0.08 | 2.14 $\pm$ 0.13 |
| m $\alpha$ -4pRML-X33 | 17.74 $\pm$ 0.11 | 20.04 $\pm$ 0.03 | 4.17 $\pm$ 0.15 |
| m $\alpha$ -8pRML-X33 | 19.60 $\pm$ 0.10 | 22.92 $\pm$ 0.03 | 8.07 $\pm$ 0.05 |
